# Supplementary material for: Improving the computation efficiency of polygenic risk score modeling: faster in Julia
Source: Life Sci Alliance. 2022 Jul 18;5(12):e202201382. doi: 10.26508/lsa.202201382 (PMC9297586; doi:10.26508/lsa.202201382)
Supplement: Supplementary file 1 [file LSA-2022-01382_TableS1.xlsx]

## Sheet: Sheet1
Supplemental Table 1. Median Standard Error between SNP Betas calculated in different runs of
a single implementation compared with between different algorithms
	Cross implementation Median Square Error	Python v. Python	Julia v. Julia
Asthma	2.07e-11	2.11e-11	2.13e-11
Body Mass Index	6.55e-11	6.52e-11	6.5e-11
Coronary Artery Disease	6.83e-11	6.98e-11	6.93e-11
eGFR	3.22e-11	3.26e-11	3.22e-11
HDL	3.29e-11	3.29e-11	3.29e-11
LDL	3.19e-11	3.23e-11	3.19e-11
Total Cholesterol	3.25e-11	3.2e-11	3.23e-11
Triglycerides	3.17e-11	3.19e-11	3.19e-11
Type 2 Diabetes Mellitus	2e-11	1.99e-11	2e-11
Abbreviations: eGFR, estimated glomerular filtration rate; GWAS, genome wide association study;
HDL, high-density lipoprotein; LDL, low-density lipoprotein; SNP, single nucleotide polymorphism
